# Supplementary material for: Evaluation and implementation of highly challenging balance training in clinical practice for people with Parkinson’s disease: protocol for the HiBalance effectiveness-implementation trial
Source: Springer Nature journal article supplement (doi:10.1186/s12883-017-0809-2), 2017-02-07
Supplement: MOESM3 [file 12052834]

1. [Last name], [First name]

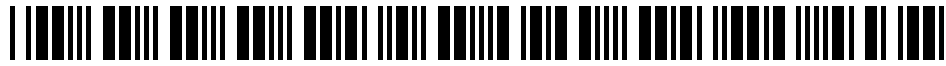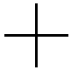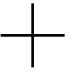

1. How has the training program affected your balance?

- My balance is a lot better
- My balance is somewhat better
- My balance is unchanged
- My balance has worsened

2. To what extent do you think the level of difficulty of the exercises increased successively during the training period?

- To a very small extent
- To a small extent
- Partly
- To a large extent
- To a very large extent

3. Mark the circle which most represents your opinion of how the following exercises challenged your balance during group training.

|                                                                 | To a very small degree   | To a small degree        | Partly                   | To a large degree        | To a very large degree   | Don't know               |
|-----------------------------------------------------------------|--------------------------|--------------------------|--------------------------|--------------------------|--------------------------|--------------------------|
| Stretching/rotation exercises i standing                        | <input type="checkbox"/> | <input type="checkbox"/> | <input type="checkbox"/> | <input type="checkbox"/> | <input type="checkbox"/> | <input type="checkbox"/> |
| Throwing/kicking a ball in standing                             | <input type="checkbox"/> | <input type="checkbox"/> | <input type="checkbox"/> | <input type="checkbox"/> | <input type="checkbox"/> | <input type="checkbox"/> |
| Standing exercises on soft/unstable surfaces                    | <input type="checkbox"/> | <input type="checkbox"/> | <input type="checkbox"/> | <input type="checkbox"/> | <input type="checkbox"/> | <input type="checkbox"/> |
| Walking exercises on soft/unstable surfaces                     | <input type="checkbox"/> | <input type="checkbox"/> | <input type="checkbox"/> | <input type="checkbox"/> | <input type="checkbox"/> | <input type="checkbox"/> |
| Walking exercises involving carrying a ball, tray or other item | <input type="checkbox"/> | <input type="checkbox"/> | <input type="checkbox"/> | <input type="checkbox"/> | <input type="checkbox"/> | <input type="checkbox"/> |
| Walking over or around obstacles                                | <input type="checkbox"/> | <input type="checkbox"/> | <input type="checkbox"/> | <input type="checkbox"/> | <input type="checkbox"/> | <input type="checkbox"/> |
| Walking exercises involving simultaneous counting or word tasks | <input type="checkbox"/> | <input type="checkbox"/> | <input type="checkbox"/> | <input type="checkbox"/> | <input type="checkbox"/> | <input type="checkbox"/> |

Your own example of an exercise which you thought was especially challenging:

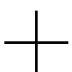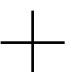



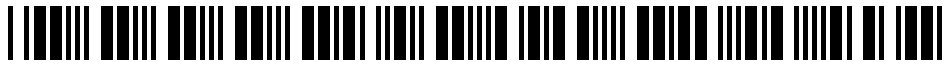

8. Was there anything which you thought was missing from the group-based balance training program?

Yes

No

If yes, describe what you thought was missing:

9. Have you completed the home exercise program during the entire 10-week period?

Yes

No

If yes, describe how many times a week you have performed the home exercise program

10. The following statement concern the home exercise program, mark the circle which most represents your experiences

|                                                                                                           | Strongly disagree        | Disagree                 | Agree                    | Strongly agree           | Don't know               |
|-----------------------------------------------------------------------------------------------------------|--------------------------|--------------------------|--------------------------|--------------------------|--------------------------|
| The exercises were in line with my capacity                                                               | <input type="checkbox"/> | <input type="checkbox"/> | <input type="checkbox"/> | <input type="checkbox"/> | <input type="checkbox"/> |
| I felt that the home exercises became gradually easier to perform                                         | <input type="checkbox"/> | <input type="checkbox"/> | <input type="checkbox"/> | <input type="checkbox"/> | <input type="checkbox"/> |
| The home exercise program felt meaningful to carry out                                                    | <input type="checkbox"/> | <input type="checkbox"/> | <input type="checkbox"/> | <input type="checkbox"/> | <input type="checkbox"/> |
| I am motivated to continue carrying out the home exercises on my own when the training period is finished | <input type="checkbox"/> | <input type="checkbox"/> | <input type="checkbox"/> | <input type="checkbox"/> | <input type="checkbox"/> |



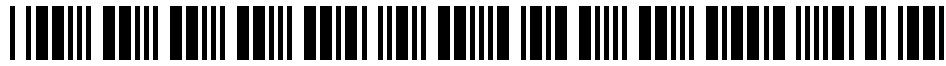

11. Do you think that your balance was challenged during the group training sessions?

- To a very small extent
- To a small extent
- Partly
- To a large extent
- To a very large extent

---

12. Was there a particular exercise in the home exercise program which was especially difficult to do?

- Yes
- No

If yes, describe which exercise:

---

13. Did you slip, trip or loose you balance so that you fell during the home exercise program?

- Yes
- No

If yes, describe how many times this happened and if you injured yourself in any way:

---

14. Was there anything you thought was missing from the home exercise program?

- Yes
- No

if yes, describe what you think was missing
