# Supplementary material for: Evaluation and implementation of highly challenging balance training in clinical practice for people with Parkinson’s disease: protocol for the HiBalance effectiveness-implementation trial
Source: Springer Nature journal article supplement (doi:10.1186/s12883-017-0809-2), 2017-02-07
Supplement: MOESM5 [file 12052834]

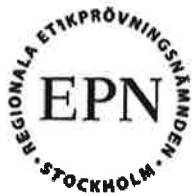

Regionala etikprövningsnämnden i Stockholm  
Protokoll 2016/2:2

**Utdrag ur protokoll från sammanträde den 2 mars 2016 i avdelningen 2.**

---

---

Diarienummer:  
2016/201-31/2  
Föredragande:  
Yvonne Forsell

**Sökande:** Karolinska Institutet  
**Behörig företrädare:** Maria Eriksdotter  
**Projekt:** Implementering av HiBalance träning för personer med Parkinsons sjukdom  
**Forskare som genomför projektet:** Erika Franzén

---

**BESLUT**

Nämnden godkänner forskningen med följande villkor.

1. I forskningspersonsinformation ska individen tillfrågas om att delta i stället för att hälsas välkommen.
2. Kontaktperson för PUL saknas i forskningspersonsinformation.

**Hur man överklagar, se särskild information.**

### Ordförande

Christian Groth

### Ledamöter med vetenskaplig kompetens

Pär Sparén vetenskaplig sekreterare (*medicinsk epidemiologi*) deltog inte i 2016/191 och 2016/192 pga. jäv

Aniko Bartfai (*klinisk neuropsykologi*)

Mats Blennow (*pediatrik*) deltog inte i 2016/202 pga. jäv

Kristian Borg (*neurologi*) skriftliga föredragningar

Mats Eriksson (*endokrinologi*) deltog inte i 2015; 2294, 2325, 1954, 2016; 175; 181

Gunilla Sandborgh (*odontologi*)

Yvonne Forsell (*psykiatri, geriatrik*) deltog inte i 2016/175 pga. jäv

Greger Lindberg (*gastroenterologi*)

Thomas Sejersen (*neuropediatrik*) deltog inte i 2016/242, 250, 264

### Ledamöter som företräder allmänna intressen

Jörgen Bengtsson

Kemo Ceesay

Gunilla Johansson

Ewa Schenström

Ingmar Wallén

### Administrativ sekreterare

Jenny Karte

§ 1 Ordföranden förklarar sammanträdet öppnat.

§ 2 Greger Lindberg förordnas som vetenskaplig sekreterare i ärende 2016/191 och 2016/192 då Pär Sparén är jävig.

§ 3 Ansökningar om etisk granskning av forskningsprojekt, se **Bilaga**.

§ 4 Ordföranden meddelar att nästa sammanträde i avdelning 2 äger rum **onsdagen den 30 mars**.

§ 5 Ordföranden förklarar mötet avslutat.



Christian Groth  
Ordförande

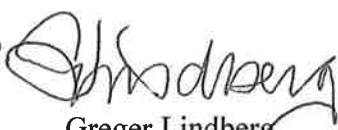

Greger Lindberg  
Vetenskaplig sekreterare



Pär Sparén  
Vetenskaplig sekreterare
